# Supplementary material
Source: PubMed Central journal article supplement (PMC3508728)
Supplement: NIHMS421462-supplement-Supplementary_Data.pdf [file NIHMS421462-supplement-Supplementary_Data.pdf]

**Appendix S1:** The NeuroBSIK Mouse Phenomics consortium collaborators.

The NeuroBSIK Mouse Phenomics consortium collaborators are: Brussaard AB, Borst JGG, Elgersma Y, Galjart N, van der Horst GT, Levelt CN, Pennartz CMA, Smit AB, Spruijt BM, Verhage M, de Zeeuw CI.

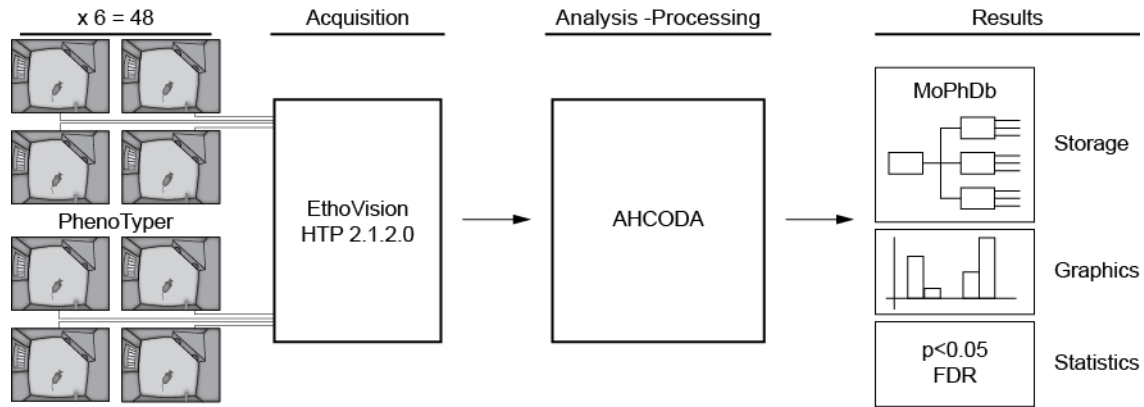

**Fig. S1:** Overview of the screening system with 48 cages connected to 12 computers running EthoVision HTP 2.1.2.0 software, controlling hardware in the PhenoTyper and saving track files containing X and Y coordinates and zone visits of mice at 15 frames/s. Track files were error corrected and smoothed using EthoVision HTP 2.1.2.0 software offline, and statistically analyzed and visualized with AHCODA.

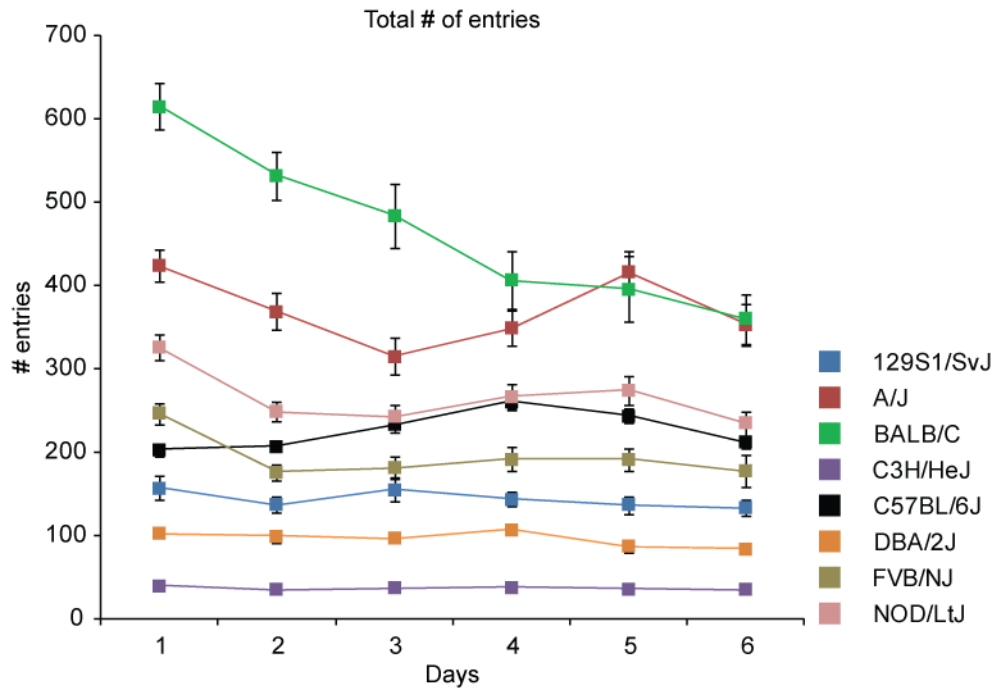

**Fig. S2:** Total number of entries per day during the 6 experimental days. C3H, DBA, 129S1, FVB, NOD displayed a stable number of entries along the experiment. C57 mice showed an increase until day 4 and then a decrease in the number of entries. A/J mice showed a decrease until day 3 then an increase until day 5 and finally a small decrease on day 6. BALB mice showed a constant decrease in the number of entries (see Table S3 and S8 for statistical details).

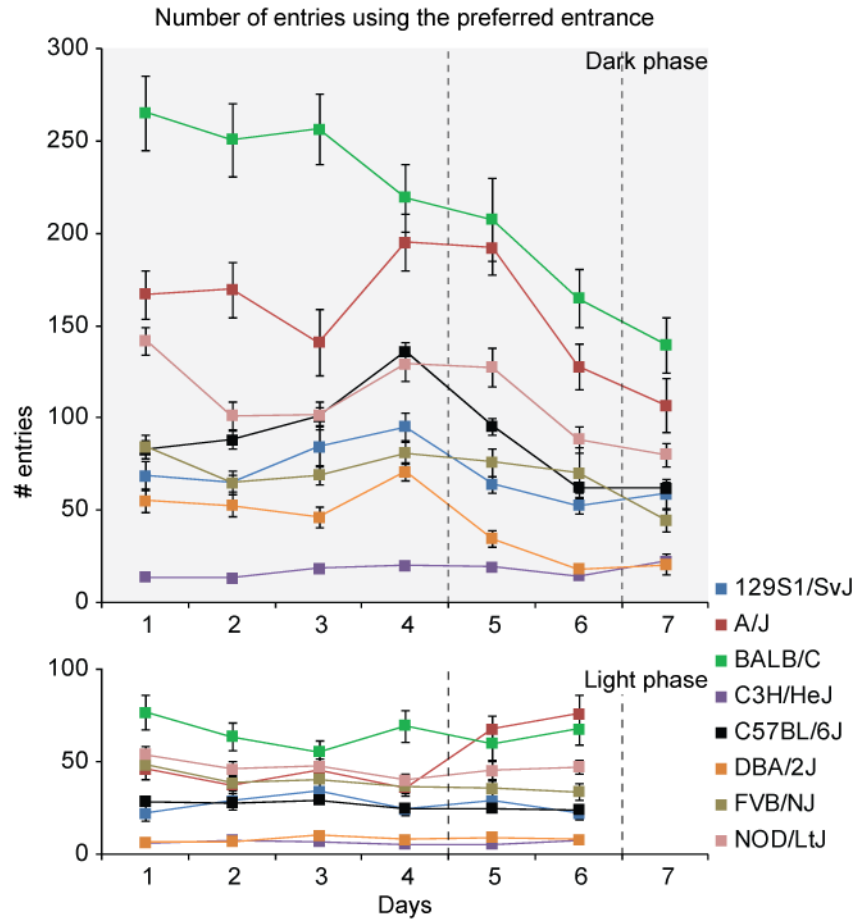

**Fig. S3:** Number of preferred entrances during the 6.5 days of experiment. The vertical dashed lines delineates the test period. Three strains (C57, 129S1, DBA) showed a decrease in the use of the preferred entrance at the beginning of the test period in the dark phase. BALB, A/J, NOD, FVB mice showed a decrease starting on day 5. C3H did not show any change in preferred entrance use. The differences were smaller in the light phase, during which mice did not seem to change their use of the preferred entrance. Only A/J mice showed an increase in the use of the preferred entrance during the test period in the light phase.

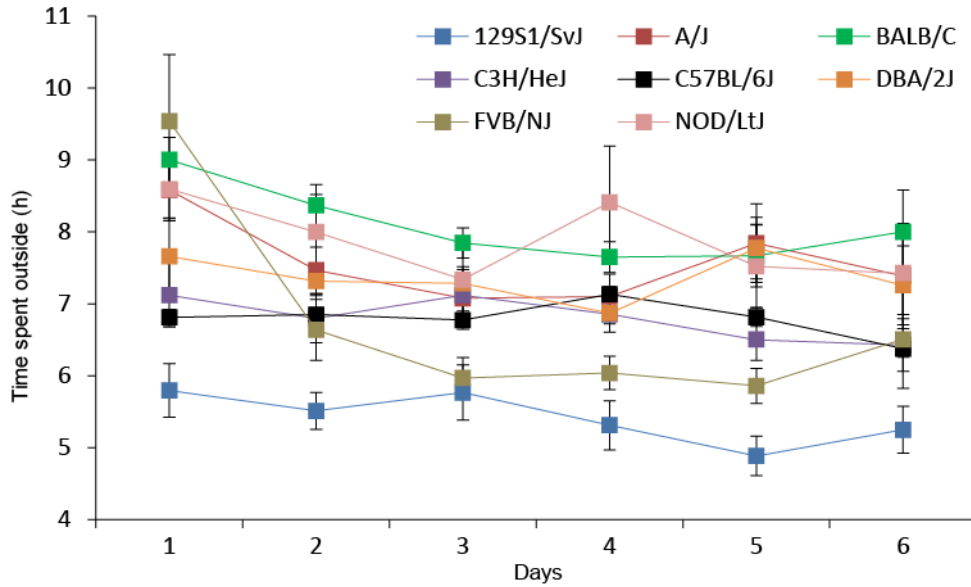

**Fig. S4:** Time spent outside the shelter. A repeated measures ANOVA showed a general decrease in the time spent outside during the 3 first days (between days 1 and 2 ( $F_{(1,312)}=20.7$ ;  $p<0.001$ ), and days 2 and 3 ( $F_{(1,312)}=6.56$ ;  $p=0.01$ )). This overall effect is mainly due to A/J and FVB that show a significant decrease between day 1 and 2 (respectively  $p=0.003$  and  $p<0.001$ ).

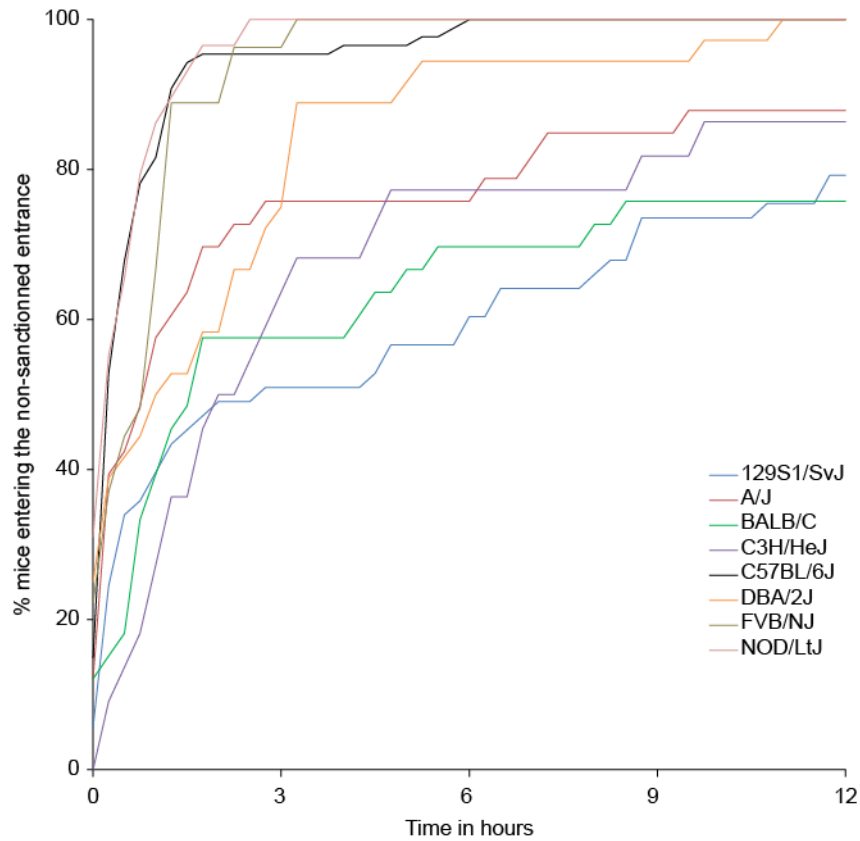

**Fig. S5:** Cumulative plot of the percentage of mice that entered the shelter through the non-sanctioned entrance during the dark phase of day 5. After 6 h of the dark phase of day 5, 100% of C57, FVB and NOD visited the non-sanction entrance at least once. The last DBA mouse visiting this entrance showed this response at 11 h of the dark phase. Not all 129S1, A/J, BALB and C3H mice visited the non-sanctioned entrance after 12 h. Those mice were excluded from the further analysis because they were not aware of the presence of a non-sanctioned entrance and therefore could not learn to change their preference.

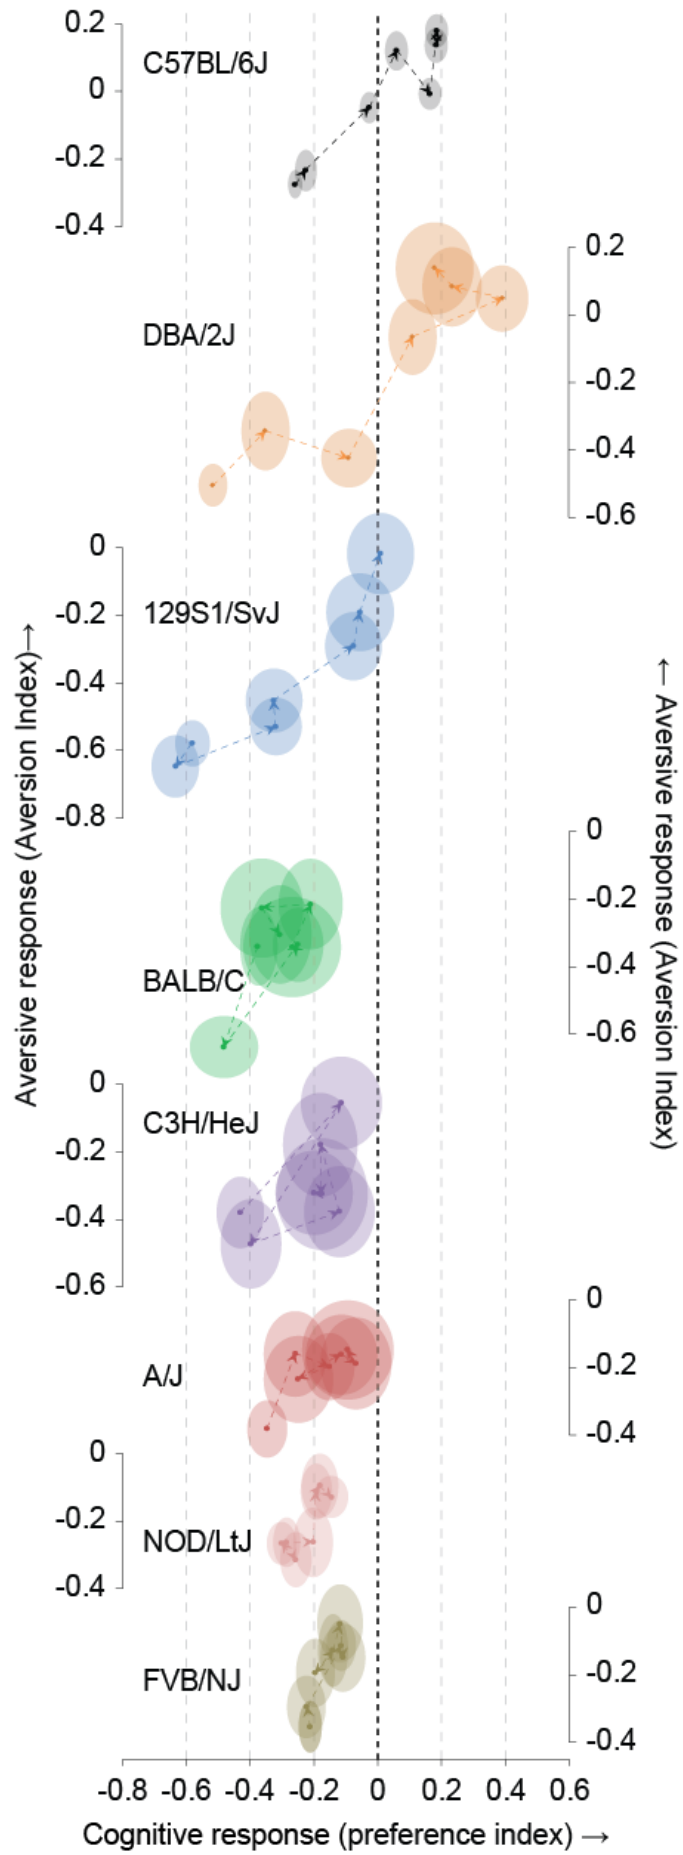

**Fig. S6.** Indexes Plot. We plotted in one graph the deliberate change in preference to enter through the non-sanctioned entrance (X-axis), and the change in time spent in the shelter after entering through the non-sanctioned entrance (Y-axis). To simplify the visualization, the two parameters plotted here are the inverse of the preferred index and the aversion index. These two parameters are plotted against each other before the introduction of the aversive stimulus (day 4), during the two days when the stimulus is operational (days 5-6), and in dark phase of day 7 when the stimulus was no longer applied (12 h bins, dark and light phase). Aversion (upward shift) is expected to develop instantaneously in response to the aversive stimulus, whereas the cognitive response (rightward shift) is expected to develop gradually, reflecting the avoidance learning process. C57 mice showed such a response: during the first 24 h (day 5) the response involved both aversion (upward) and cognitive (rightward) aspects, followed by a stabilization of the aversion behavior whereas development of the cognitive aspect of the response continued (only a further rightward shift) during the following 24 h (day 6). A similar pattern was observed for DBA mice, until the end of day 5, but the preference change stabilized on day 6 already. 129S1 mice showed most of the cognitive response preceding the aversive response. This can be explained by the fact that during the dark phase of day 5 the response is mainly driven by a decrease of the use of the preferred entrance and that during the light phase almost no changes occur. The main part of the aversive and cognitive responses takes place during day 6. BALB mice display an upward shift only during the dark phase of day 5 (aversive response mainly). The remaining genotypes (C3H, A/J, FVB and NOD) showed no significant aversion response (although individual mice did), nor a cognitive response.



| <b>Strain</b>        | <b>WT</b> | <b>KO</b> | <b>HZ</b> |
|----------------------|-----------|-----------|-----------|
| <b>218l</b>          | 6         | 5         |           |
| <b>305d</b>          | 12        | 12        |           |
| <b>alpha7</b>        | 25        | 23        |           |
| <b>beta2</b>         | 7         | 16        | 9         |
| <b>bko</b>           | 12        | 12        |           |
| <b>brevican</b>      | 25        | 25        |           |
| <b>ckii</b>          | 13        | 11        |           |
| <b>cb1</b>           | 14        | 20        | 11        |
| <b>clasp2</b>        | 12        | 11        |           |
| <b>clip115</b>       | 20        | 24        | 4         |
| <b>clip170</b>       | 11        | 13        |           |
| <b>DJ1</b>           | 10        | 9         | 22        |
| <b>doc2A</b>         | 18        | 28        | 4         |
| <b>doc2ab</b>        |           | 17        |           |
| <b>fgf13</b>         | 19        | 36        | 9         |
| <b>Fx</b>            | 40        | 10        | 26        |
| <b>kazubcatloxp</b>  | 12        | 12        |           |
| <b>kazugaa1</b>      | 14        | 10        |           |
| <b>kazu-t</b>        |           | 23        |           |
| <b>kazu-tlnic403</b> |           | 24        |           |
| <b>Kcnd2</b>         | 6         | 5         | 12        |
| <b>lach</b>          | 12        | 12        |           |
| <b>loxm18 null</b>   | 12        |           | 12        |
| <b>mcry1</b>         | 20        | 19        | 8         |
| <b>mcry1mcry2</b>    | 13        | 11        |           |
| <b>mcry2</b>         | 11        | 14        |           |
| <b>menin</b>         | 14        | 12        |           |
| <b>munc18</b>        | 59        |           | 61        |
| <b>nf1</b>           | 12        |           | 12        |
| <b>ng3</b>           | 13        | 14        | 13        |
| <b>pkci</b>          | 12        | 12        |           |
| <b>r192q</b>         | 10        | 12        |           |
| <b>scap</b>          | 12        | 12        |           |
| <b>Snap25</b>        | 28        |           | 35        |
| <b>specc1</b>        | 23        | 25        |           |
| <b>syt1</b>          | 21        |           | 24        |
| <b>tarp8</b>         | 7         |           | 13        |
| <b>tmed</b>          | 6         | 13        | 6         |
| <b>trim3</b>         | 12        | 12        | 12        |
| <b>tsc</b>           | 12        |           | 12        |
| <b>tscb6</b>         | 12        |           | 12        |
| <b>ube3</b>          | 12        |           | 12        |

|             |   |    |   |
|-------------|---|----|---|
| <b>Ubn1</b> | 6 | 10 | 6 |
|-------------|---|----|---|

**Table S1:** List of the number of mutagenized mice (WT: wild-type; KO: Knock-out; HZ: heterozygous) screened in the PhenoTyper.

|                    | Maximum number of entries in 15 min | Average entries in 15 min |
|--------------------|-------------------------------------|---------------------------|
| <b>129S1/SvImJ</b> | 81                                  | 6                         |
| <b>A/J</b>         | 84                                  | 12                        |
| <b>BALB/C</b>      | 111                                 | 21                        |
| <b>C3H/HeJ</b>     | 15                                  | 2                         |
| <b>C57BL/6J</b>    | 68                                  | 9                         |
| <b>DBA/2J</b>      | 44                                  | 4                         |
| <b>FVB/NJ</b>      | 45                                  | 7                         |
| <b>NOD/LtJ</b>     | 47                                  | 8                         |

**Table S2:** Maximum number of shelter entries and average number of shelter entries in 15 min for each strain.

|                         | (J)<br>days | Mean<br>Difference<br>(D4-J) | Std.<br>Error | df | Sig. | 95% Wald Confidence<br>Interval for Difference |         | Habituation<br>day 1 to 4 |
|-------------------------|-------------|------------------------------|---------------|----|------|------------------------------------------------|---------|---------------------------|
|                         |             |                              |               |    |      | Lower                                          | Upper   |                           |
| <b>129S1/SvIm<br/>J</b> | 1           | -13.72                       | 14.518        | 1  | .345 | -42.17                                         | 14.74   | stable                    |
|                         | 2           | 6.09                         | 9.287         | 1  | .512 | -12.11                                         | 24.30   |                           |
|                         | 3           | -12.09                       | 11.392        | 1  | .288 | -34.42                                         | 10.23   |                           |
| <b>A/J</b>              | 1           | -74.58                       | 21.953        | 1  | .001 | -117.60                                        | -31.55  | decrease                  |
|                         | 2           | -20.09                       | 21.614        | 1  | .353 | -62.45                                         | 22.27   |                           |
|                         | 3           | 34.09                        | 15.497        | 1  | .028 | 3.72                                           | 64.47   |                           |
| <b>BALB/C</b>           | 1           | -208.36                      | 39.886        | 1  | .000 | -286.54                                        | -130.19 | decrease                  |
|                         | 2           | -125.39                      | 34.855        | 1  | .000 | -193.71                                        | -57.08  |                           |
|                         | 3           | -77.88                       | 20.455        | 1  | .000 | -117.97                                        | -37.79  |                           |
| <b>C3H/HeJ</b>          | 1           | -1.82                        | 3.283         | 1  | .580 | -8.25                                          | 4.62    | stable                    |
|                         | 2           | 2.82                         | 2.594         | 1  | .277 | -2.27                                          | 7.90    |                           |
|                         | 3           | .55                          | 2.369         | 1  | .818 | -4.10                                          | 5.19    |                           |
| <b>C57BL/6J</b>         | 1           | 57.87                        | 8.873         | 1  | .000 | 40.48                                          | 75.26   | increase                  |
|                         | 2           | 53.30                        | 7.448         | 1  | .000 | 38.70                                          | 67.90   |                           |
|                         | 3           | 28.23                        | 6.446         | 1  | .000 | 15.60                                          | 40.86   |                           |
| <b>DBA/2J</b>           | 1           | 3.92                         | 6.361         | 1  | .538 | -8.55                                          | 16.38   | stable                    |
|                         | 2           | 7.44                         | 7.521         | 1  | .322 | -7.30                                          | 22.19   |                           |
|                         | 3           | 9.78                         | 4.455         | 1  | .028 | 1.05                                           | 18.51   |                           |
| <b>FVB/NJ</b>           | 1           | -54.48                       | 11.246        | 1  | .000 | -76.52                                         | -32.44  | decrease                  |
|                         | 2           | 15.52                        | 10.302        | 1  | .132 | -4.67                                          | 35.71   |                           |
|                         | 3           | 10.89                        | 6.323         | 1  | .085 | -1.50                                          | 23.28   |                           |
| <b>NOD/LtJ</b>          | 1           | -58.31                       | 14.684        | 1  | .000 | -87.09                                         | -29.53  | decrease                  |
|                         | 2           | 18.07                        | 12.182        | 1  | .138 | -5.81                                          | 41.95   |                           |
|                         | 3           | 24.24                        | 9.777         | 1  | .013 | 5.08                                           | 43.40   |                           |

**Table S3.** Habituation pattern. This table compares the total number of entries on days 1, 2 and 3 to day 4. 129 and C3H mice showed a stable number of entries along the 4 days. C57 and DBA showed an increase between days 1 and day 4, whereas A/J, BALB, FVB and NOD mice displayed a decrease in the number of entries.

|                    | Mean<br>Difference<br>(Dark-Light) | Std.<br>Error | df | Sig. | 95% Wald<br>Confidence Interval<br>for Difference |          |
|--------------------|------------------------------------|---------------|----|------|---------------------------------------------------|----------|
|                    |                                    |               |    |      | Lower                                             | Upper    |
| <b>129S1/SvImJ</b> | 74.9198                            | 7.51610       | 1  | .000 | 60.1885                                           | 89.6511  |
| <b>A/J</b>         | 212.6742                           | 15.84387      | 1  | .000 | 181.6208                                          | 243.7276 |
| <b>BALB/C</b>      | 301.2273                           | 24.65966      | 1  | .000 | 252.8952                                          | 349.5593 |
| <b>C3H/HeJ</b>     | 16.8636                            | 1.17620       | 1  | .000 | 14.5583                                           | 19.1690  |
| <b>C57BL/6J</b>    | 131.2184                           | 4.87891       | 1  | .000 | 121.6559                                          | 140.7809 |
| <b>DBA/2J</b>      | 74.8264                            | 3.72513       | 1  | .000 | 67.5253                                           | 82.1275  |
| <b>FVB/NJ</b>      | 60.1111                            | 4.58157       | 1  | .000 | 51.1314                                           | 69.0908  |
| <b>NOD/LtJ</b>     | 120.2414                           | 8.33301       | 1  | .000 | 103.9090                                          | 136.5738 |

**Table S4.** GEE model comparing the total number of entries in the dark and light phase for the first 4 days. All the strains showed a highly significant ( $p < 0.0001$ ) difference between the entries in the shelter during the dark and the light phase.

|                    | <b>Pearson<br/>Correlation</b> | <b>Sig. (2-tailed)</b> | <b>N</b> |
|--------------------|--------------------------------|------------------------|----------|
| <b>129S1/SvImJ</b> | .249                           | .073                   | 53       |
| <b>A/J</b>         | .138                           | .445                   | 33       |
| <b>BALB/C</b>      | .382                           | .028                   | 33       |
| <b>C3H/HeJ</b>     | -.219                          | .328                   | 22       |
| <b>C57BL/6J</b>    | .615                           | .000                   | 86       |
| <b>DBA/2J</b>      | .475                           | .003                   | 35       |
| <b>FVB/NJ</b>      | .706                           | .000                   | 27       |
| <b>NOD/LtJ</b>     | .701                           | .000                   | 28       |

**Table S5.** Correlation between the distance moved and the number of entries. C57, DBA, FVB, NOD mice showed highly significant correlation ( $p < 0.0001$ ) between the distance moved and the number of entries during the first 4 days; BALB mice displayed a weaker correlation but still significant ( $p < 0.05$ ), whereas A/J and C3h showed no significant correlation.

|                    | % of mice having a significant (FDR =0.014)<br>preferred entrance |
|--------------------|-------------------------------------------------------------------|
| <b>129S1/SvImJ</b> | 86.8                                                              |
| <b>A/J</b>         | 75.8                                                              |
| <b>BALB/C</b>      | 93.9                                                              |
| <b>C3H/HeJ</b>     | 36.4                                                              |
| <b>C57BL/6J</b>    | 65.5                                                              |
| <b>DBA/2J</b>      | 80.6                                                              |
| <b>FVB/NJ</b>      | 48.1                                                              |
| <b>NOD/LtJ</b>     | 69.0                                                              |

**Table S6.** Percentage of mice showing a significant preferred entrance on day 4. On day 4, Over 80% of 129S1, A/J, BALB and DBA mice had a significant preference (i.e significantly higher than 50%) for one of the 2 entrances. Of C57, FVB, NOD , 65.7, 53.1 and 61.4% respectively had a preference on day 4. Only 36% of C3H mice had developed a significant preference on day 4. less than half the population (36%) that showed a significant preference on day 4.

|                    | <b>mice not using the<br/>non-sanction<br/>entrance on day 5<br/>dark phase</b> |
|--------------------|---------------------------------------------------------------------------------|
| <b>129S1/SvImJ</b> | 11                                                                              |
| <b>A/J</b>         | 4                                                                               |
| <b>BALB/C</b>      | 8                                                                               |
| <b>C3H/HeJ</b>     | 3                                                                               |

**Table S7.** Number of mice per strain that failed to use the non-sanctioned entrance 12h after the beginning of the test phase on day 5.



|                    | Day<br>(J) | Mean Difference<br>(J-d4) | Std. Error | df | Sig.<br>( $\alpha=0.018$ ) | 95% Wald<br>Confidence Interval<br>for Difference |       |
|--------------------|------------|---------------------------|------------|----|----------------------------|---------------------------------------------------|-------|
|                    |            |                           |            |    |                            | Lower                                             | Upper |
| <b>129S1/SvImJ</b> | 5          | .18                       | 0.043      | 1  | <b>0.000</b>               | .09                                               | .26   |
|                    | 6          | .30                       | 0.048      | 1  | <b>0.000</b>               | .20                                               | .39   |
| <b>A/J</b>         | 5          | .36                       | 0.162      | 1  | 0.025                      | .05                                               | .68   |
|                    | 6          | .43                       | 0.172      | 1  | <b>0.013</b>               | .09                                               | .76   |
| <b>BALB/C</b>      | 5          | .08                       | 0.028      | 1  | <b>0.006</b>               | .02                                               | .13   |
|                    | 6          | .12                       | 0.037      | 1  | <b>0.001</b>               | .05                                               | .19   |
| <b>C3H/HeJ</b>     | 5          | .07                       | 0.050      | 1  | 0.179                      | -.03                                              | .17   |
|                    | 6          | .12                       | 0.052      | 1  | 0.020                      | .02                                               | .22   |
| <b>C57BL/6J</b>    | 5          | .13                       | 0.014      | 1  | <b>0.000</b>               | .10                                               | .15   |
|                    | 6          | .21                       | 0.016      | 1  | <b>0.000</b>               | .18                                               | .24   |
| <b>DBA/2J</b>      | 5          | .25                       | 0.039      | 1  | <b>0.000</b>               | .17                                               | .32   |
|                    | 6          | .43                       | 0.041      | 1  | <b>0.000</b>               | .35                                               | .51   |
| <b>FVB/NJ</b>      | 5          | .03                       | 0.023      | 1  | 0.155                      | -.01                                              | .08   |
|                    | 6          | .04                       | 0.037      | 1  | 0.281                      | -.03                                              | .11   |
| <b>NOD/LtJ</b>     | 5          | .00                       | 0.020      | 1  | 0.917                      | -.04                                              | .04   |
|                    | 6          | .05                       | 0.024      | 1  | 0.030                      | .00                                               | .10   |
| <b>SPECC1-WT</b>   | 5          | 0.16                      | 0.025      | 1  | <b>0.000</b>               | 0.11                                              | 0.21  |
|                    | 6          | 0.28                      | 0.024      | 1  | <b>0.000</b>               | 0.23                                              | 0.33  |
| <b>SPECC1-KO</b>   | 5          | 0.14                      | 0.108      | 1  | 0.197                      | -0.07                                             | 0.35  |
|                    | 6          | 0.17                      | 0.109      | 1  | 0.126                      | -0.05                                             | 0.38  |

**Table S8** Results of the generalized estimated equations (GEE) on the proportion of entries through the preferred entrance. Day 4 is used as the reference day. The simple contrast test showed significant (FDR= 0.018) differences between days 4 and 5 for 129, C57, DBA and BALB/C, and a significant difference in the proportion of entries through the preferred entrance between days 4 and 6 for 129, A/J, C57, DBA and BALB/C. The mean difference is positive because we observe an increase in the probability between days 4 and 5 and day 6. SPECC1-WT mice showed a significant increase during both days of testing, whereas SPECC1-KO did not show a significant change.

| (I) Strain         | (J) Strain | Mean Difference (I-J) | Std. Error | df | Sig. ( $\alpha=0.032$ ) | 95% Wald Confidence Interval for Difference |       |
|--------------------|------------|-----------------------|------------|----|-------------------------|---------------------------------------------|-------|
|                    |            |                       |            |    |                         | Lower                                       | Upper |
| <b>129S1/SvlmJ</b> | a/j        | .05                   | .040       | 1  | .214                    | -.03                                        | .13   |
|                    | balb/c     | .01                   | .044       | 1  | .810                    | -.08                                        | .10   |
|                    | c3h/hej    | .00                   | .046       | 1  | .947                    | -.09                                        | .09   |
|                    | c57bl/6j   | .13                   | .034       | 1  | <b>.000</b>             | .07                                         | .20   |
|                    | dba/2j     | .13                   | .044       | 1  | <b>.003</b>             | .04                                         | .22   |
|                    | fvb/nj     | .05                   | .045       | 1  | .295                    | -.04                                        | .13   |
|                    | nod/ltj    | .02                   | .037       | 1  | .673                    | -.06                                        | .09   |
| <b>a/j</b>         | balb/c     | -.04                  | .038       | 1  | .305                    | -.11                                        | .04   |
|                    | c3h/hej    | -.05                  | .040       | 1  | .190                    | -.13                                        | .03   |
|                    | c57bl/6j   | .08                   | .025       | 1  | <b>.001</b>             | .03                                         | .13   |
|                    | dba/2j     | .08                   | .037       | 1  | .033                    | .01                                         | .15   |
|                    | fvb/nj     | .00                   | .038       | 1  | .949                    | -.08                                        | .07   |
|                    | nod/ltj    | -.03                  | .028       | 1  | .231                    | -.09                                        | .02   |
| <b>balb/c</b>      | c3h/hej    | -.01                  | .044       | 1  | .758                    | -.10                                        | .07   |
|                    | c57bl/6j   | .12                   | .032       | 1  | <b>.000</b>             | .06                                         | .18   |
|                    | dba/2j     | .12                   | .042       | 1  | <b>.005</b>             | .04                                         | .20   |
|                    | fvb/nj     | .04                   | .043       | 1  | .399                    | -.05                                        | .12   |
|                    | nod/ltj    | .00                   | .034       | 1  | .889                    | -.06                                        | .07   |
| <b>c3h/hej</b>     | c57bl/6j   | .14                   | .034       | 1  | <b>.000</b>             | .07                                         | .20   |
|                    | dba/2j     | .13                   | .044       | 1  | <b>.003</b>             | .05                                         | .22   |
|                    | fvb/nj     | .05                   | .045       | 1  | .267                    | -.04                                        | .14   |
|                    | nod/ltj    | .02                   | .037       | 1  | .616                    | -.05                                        | .09   |
| <b>c57bl/6j</b>    | dba/2j     | .00                   | .031       | 1  | .923                    | -.06                                        | .06   |
|                    | fvb/nj     | -.09                  | .033       | 1  | <b>.009</b>             | -.15                                        | -.02  |
|                    | nod/ltj    | -.12                  | .020       | 1  | <b>.000</b>             | -.16                                        | -.08  |
| <b>dba/2j</b>      | fvb/nj     | -.08                  | .043       | 1  | .054                    | -.17                                        | .00   |
|                    | nod/ltj    | -.11                  | .034       | 1  | <b>.001</b>             | -.18                                        | -.05  |
| <b>fvb/nj</b>      | nod/ltj    | -.03                  | .035       | 1  | .369                    | -.10                                        | .04   |
| <b>specc1-wt</b>   | specc1-ko  | -.09                  | .044       | 1  | .036                    | -.18                                        | -.01  |
| <b>c57bl/6j</b>    | specc1-ko  | -.07                  | .038       | 1  | .048                    | -.15                                        | .00   |
| <b>c57bl/6j</b>    | specc1-wt  | .02                   | .026       | 1  | .522                    | -.03                                        | .07   |

**Table S9.** GEE results for pair-wise comparison of the effect of the sanctioned entrance on the number of entries through the preferred entrance between strains.

|                         | Source                  | days           | phase          | Type III<br>Sum of<br>Squares | df        | Mean<br>Square | F           | Sig.<br>( $\alpha=0.041$ ) |
|-------------------------|-------------------------|----------------|----------------|-------------------------------|-----------|----------------|-------------|----------------------------|
| <b>all strains</b>      | days                    | overall        |                | 23.383                        | 4, 1174   | 5.637          | 13.515      | <b>.000</b>                |
|                         |                         | D1 vs. D2      |                | 1.821                         | 1         | 1.821          | 5.974       | <b>.015</b>                |
|                         |                         | D2 vs. D3      |                | 2.096                         | 1         | 2.096          | 7.545       | <b>.006</b>                |
|                         |                         | D4 vs. D5      |                | 2.341                         | 1         | 2.341          | 11.425      | <b>.001</b>                |
|                         |                         | D5 vs. D6      |                | 5.170                         | 1         | 5.170          | 21.428      | <b>.000</b>                |
|                         | days * Strain_R         | overall        |                | 22.524                        | 29.1      | .776           | 1.860       | <b>.004</b>                |
|                         |                         | D1 vs. D2      |                | 6.242                         | 7         | .892           | 2.925       | <b>.006</b>                |
|                         |                         | D4 vs. D5      |                | 4.924                         | 7         | .703           | 3.433       | <b>.002</b>                |
|                         | phase                   | overall        | Dark vs. Light | .001                          | 1, 283    | .001           | .017        | .895                       |
|                         | phase * Strain_R        | overall        | Dark vs. Light | .866                          | 7         | .124           | 2.031       | .051                       |
|                         | days * phase            | overall        |                | 2.296                         | 4.9, 1380 | .471           | 2.408       | <b>.036</b>                |
|                         |                         | D3 vs. D4      | Dark vs. Light | 4.456                         | 1         | 4.456          | 5.657       | <b>.018</b>                |
|                         | days * phase * Strain_R | overall        |                | 8.828                         | 34.142    | .259           | 1.322       | .102                       |
| <b>129S1/SvIm<br/>J</b> | days                    | overall        |                | 14.129                        | 3.474     | 4.067          | 7.395       | <b>.000</b>                |
|                         |                         | D1 vs. D2      |                | 4.805                         | 1         | 4.805          | 12.593      | <b>.001</b>                |
|                         |                         | D4 vs. D5      |                | .620                          | 1         | .620           | 4.922       | <b>.032</b>                |
|                         |                         | D5 vs. D6      |                | 2.632                         | 1         | 2.632          | 7.984       | <b>.007</b>                |
|                         | phase                   | overall        | Dark vs. Light | .042                          | 1         | .042           | .636        | .430                       |
|                         | days * phase            | overall        |                | 1.042                         | 4.275     | .244           | 1.066       | .377                       |
| <b>A/J</b>              | days                    | overall        |                | 2.328                         | 3.617     | .644           | 1.087       | .364                       |
|                         | phase                   | overall        | Dark vs. Light | .029                          | 1         | .029           | .290        | .594                       |
|                         | days * phase            | overall        |                | .707                          | 4.224     | .167           | .549        | .710                       |
| <b>BALB/C</b>           | days                    | overall        |                | 2.774                         | 3.932     | .705           | 1.115       | .354                       |
|                         | phase                   | overall        | Dark vs. Light | .121                          | 1         | .121           | 2.475       | .129                       |
|                         | days * phase            | overall        |                | .962                          | 4.222     | .228           | 1.243       | .297                       |
|                         |                         | D4 vs. D5      | Dark vs. Light | 2.108                         | 1         | 2.108          | 7.359       | <b>.012</b>                |
| <b>C3H/HeJ</b>          | days                    | overall        |                | 5.464                         | 2.607     | 2.096          | 2.799       | .057                       |
|                         |                         | D5 vs. D6      |                | .571                          | 1         | .571           | 5.253       | <b>.034</b>                |
|                         | phase                   | overall        | Dark vs. Light | .082                          | 1         | .082           | 1.726       | .205                       |
|                         | days * phase            | overall        |                | 2.992                         | 3.717     | .805           | 2.910       | <b>.031</b>                |
|                         | D3 vs. D4               | Dark vs. Light | 4.426          | 1                             | 4.426     | 11.175         | <b>.004</b> |                            |
| <b>C57BL/6J</b>         | days                    | overall        |                | 14.599                        | 4.323     | 3.377          | 10.810      | <b>.000</b>                |
|                         |                         | D4 vs. D5      |                | 7.303                         | 1         | 7.303          | 32.806      | <b>.000</b>                |
|                         | phase                   | overall        | Dark vs. Light | .379                          | 1         | .379           | 7.178       | <b>.009</b>                |
|                         | days * phase            | overall        |                | 1.927                         | 4.762     | .405           | 2.187       | .058                       |
| <b>DBA/2J</b>           | days                    | overall        |                | 9.587                         | 3.466     | 2.766          | 3.769       | <b>.009</b>                |

|                              |                       |           |                |       |       |       |        |             |
|------------------------------|-----------------------|-----------|----------------|-------|-------|-------|--------|-------------|
|                              |                       | D3 vs. D4 |                | 1.976 | 1     | 1.976 | 5.352  | <b>.027</b> |
|                              |                       | D5 vs. D6 |                | 3.384 | 1     | 3.384 | 10.425 | <b>.003</b> |
|                              | phase                 | overall   | Dark vs. Light | .256  | 1     | .256  | 4.393  | .044        |
|                              | days * phase          | overall   |                | 2.226 | 4.383 | .508  | 1.734  | .139        |
|                              |                       | D5 vs. D6 | Dark vs. Light | 3.658 | 1     | 3.658 | 4.971  | <b>.032</b> |
| <b>FVB/NJ</b>                | days                  | overall   |                | 3.407 | 4.162 | .819  | 2.532  | .042        |
|                              | phase                 | overall   | Dark vs. Light | .022  | 1     | .022  | .453   | .507        |
|                              | days * phase          | overall   |                | 2.095 | 3.911 | .536  | 3.046  | <b>.021</b> |
|                              |                       | D1 vs. D2 | Dark vs. Light | 3.274 | 1     | 3.274 | 7.489  | <b>.011</b> |
|                              |                       | D2 vs. D3 | Dark vs. Light | 6.450 | 1     | 6.450 | 11.015 | <b>.003</b> |
| <b>NOD/LtJ</b>               | days                  | overall   |                | 1.176 | 4.153 | .283  | 1.571  | .185        |
|                              | phase                 | overall   | Dark vs. Light | .001  | 1     | .001  | .010   | .922        |
|                              | days * phase          | overall   |                | .060  | 4.152 | .014  | .080   | .990        |
| <b>SPECC1-<br/>WT vs. KO</b> | days                  | overall   |                | 1.746 | 3.542 | .493  | 1.118  | .352        |
|                              | days * Strain         | overall   |                | 4.014 | 3.542 | 1.133 | 2.570  | .052        |
|                              |                       | D4 vs. D5 |                | 1.235 | 1     | 1.235 | 6.925  | <b>.016</b> |
|                              | phase                 | overall   | Dark vs. Light | .026  | 1     | .026  | .596   | .449        |
|                              | phase * Strain        | overall   |                | .003  | 1.000 | .003  | .026   | .873        |
|                              | days * phase          | overall   |                | 1.708 | 4.257 | .401  | 1.892  | .115        |
|                              | days * phase * Strain | overall   |                | .262  | 4.257 | .062  | .290   | .893        |
| <b>SPECC1-<br/>KO</b>        | days                  | overall   |                | 1.975 | 2.964 | .666  | .987   | .412        |
|                              | phase                 | overall   | Dark vs. Light | .019  | 1     | .019  | .352   | .566        |
|                              | days * phase          | overall   |                | 1.439 | 3.214 | .448  | 1.656  | .193        |
| <b>SPECC1-<br/>WT</b>        | days                  | overall   |                | 3.785 | 2.986 | 1.267 | 3.373  | <b>.031</b> |
|                              |                       | D4 vs. D5 |                | 1.956 | 1     | 1.956 | 27.691 | <b>.000</b> |
|                              | phase                 | overall   | Dark vs. Light | .008  | 1     | .008  | .245   | .631        |
|                              | days * phase          | overall   |                | .531  | 3.294 | .161  | .567   | .656        |

**Table S10.** Resting time in the shelter after using the sanctioned entrance: Repeated measure ANOVA (using Greenhouse – Geisser correction) revealed a significant main effect of days ( $F(4, 1174) = 13.515, p < 0.0001$ ) and a significant interaction between the days and the strains ( $F(29.1, 1174) = 1.86, p < 0.004$ ). No effects of the light and dark phase were observed for this aversion index.

Importantly, 5 strains show a significant effect of days on the time spent in the illuminated shelter (after using the sanctioned entrance) either already between days 4 and 5 (129S1,  $p = 0.032$ ; C57,  $p < 0.0001$ ), or between days 5 and 6 (129S1, DBA, C3H, with  $p$ -values of respectively:  $p < 0.01, p < 0.01, p = 0.034$ ). A/J, BALB, NOD, however, did not change their time spent in shelter after using the preferred entrance over the 2 days of the experiment.

|                    | Group size (100%) | decrease in preference (A) | decrease in time spent (B) | increase in resting outside (C) | Combination of responses |     |     |       |
|--------------------|-------------------|----------------------------|----------------------------|---------------------------------|--------------------------|-----|-----|-------|
|                    |                   |                            |                            |                                 | A+B                      | A+C | B+C | A+B+C |
| <b>129S1/SvImJ</b> | 42                | 28 (67%)                   | 29 (69%)                   | 15 (36%)                        | 23                       | 9   | 9   | 5     |
| <b>A/J</b>         | 29                | 18 (62%)                   | 13 (45%)                   | 13 (45%)                        | 11                       | 10  | 7   | 7     |
| <b>BALB/C</b>      | 25                | 13 (52%)                   | 14 (56%)                   | 8 (32%)                         | 12                       | 4   | 5   | 4     |
| <b>C3H/HeJ</b>     | 19                | 5 (26%)                    | 7 (37%)                    | 6 (32%)                         | 3                        | 1   | 2   | 1     |
| <b>C57BL/6J</b>    | 86                | 68 (79%)                   | 64 (74%)                   | 32 (37%)                        | 56                       | 25  | 20  | 19    |
| <b>DBA/2J</b>      | 35                | 32 (91%)                   | 23 (66%)                   | 21 (60%)                        | 21                       | 20  | 14  | 13    |
| <b>FVB/NJ</b>      | 27                | 9 (33%)                    | 17 (63%)                   | 10 (37%)                        | 8                        | 3   | 5   | 2     |
| <b>NOD/LtJ</b>     | 28                | 12 (43%)                   | 15 (54%)                   | 13 (46%)                        | 9                        | 7   | 7   | 5     |

**Table S11.** Number of mice that changed significantly (A) their preference, (B) their time spent and (C) their time resting outside between day 4 and 6. The right part of the table shows the number of mice per strain showing a combination of the 3 different responses. This table is complementary to the Venn diagrams of fig 3/iii.

|                    | <b>Distance<br/>moved</b> | <b>sleep<br/>Outside</b> | <b>time<br/>shelter</b> | <b>Number<br/>of<br/>entries</b> | <b>Total</b> |
|--------------------|---------------------------|--------------------------|-------------------------|----------------------------------|--------------|
| <b>129S1/SvImJ</b> | 0                         | 1                        | 1                       | 0                                | 2            |
| <b>A/J</b>         | 0                         | 1                        | 0                       | 0                                | 1            |
| <b>BALB/C</b>      | 0                         | 2                        | 2                       | 0                                | 2            |
| <b>C3H/HeJ</b>     | 0                         | 0                        | 0                       | 0                                | 0            |
| <b>C57BL/6J</b>    | 0                         | 5                        | 5                       | 0                                | 5            |
| <b>DBA/2J</b>      | 1                         | 1                        | 1                       | 0                                | 2            |
| <b>FVB/NJ</b>      | 1                         | 0                        | 0                       | 1                                | 1            |
| <b>NOD/LtJ</b>     | 0                         | 0                        | 0                       | 0                                | 0            |

**Table S12.** Number of outliers per strain ( $>3x$  standard deviation of the strain mean) for the 4 main parameters.
